# Supplementary material for: Thoughts on how to think (and talk) about RNA structure
Source: PubMed Central journal article supplement — Proc Natl Acad Sci U S A. 2022 Apr 19;119(17):e2112677119. doi: 10.1073/pnas.2112677119 (PMC9169933; doi:10.1073/pnas.2112677119), 2022-04-19
Supplement: pnas.2112677119.sapp.pdf [file pnas.2112677119.sapp.pdf]

## Supplementary Information

### Supplementary Methods

**Determination of the accuracy of secondary structure predictions.** The PDB was searched for single-stranded RNA structures > 20 nucleotides, released between Apr 2019–Feb 2020, leading to a total of 17 X-ray crystal and cryo-electron microscopy structures ranging in size from 31–867 nucleotides (Table S1). The total number of Watson-Crick pairs within each RNA tertiary structure was counted from the reference secondary structure, which was retrieved using the RNAPDBee server. The sequence used for structural determination was used as input for Mfold (1), RNAfold (2), Sfold (3) and RNAstructure (4). Default parameters were used in all cases. A score was given to each top prediction, according to the following formula:  $\text{Score} = [N_{\text{corr}} \times (N_{\text{ref}} - N_{\text{incorr}})] / N_{\text{ref}}^2$  ( $N_{\text{ref}}$ , number of Watson-Crick pairs in the reference structure;  $N_{\text{corr}}$ , number of correct Watson-Crick pairs in the predicted model;  $N_{\text{incorr}}$ , number of Watson-Crick pairs present in the model but not in the reference structure). The average of five scores for each RNA was used to make Figure 5.

### Supplementary Table

**Table S1. Statistics for RNA structures used to generate Figure 5.** RNAs are ranked by increasing percentage of Watson-Crick pairs (5<sup>th</sup> column).

| name                                                                 | PDB ID               | release date | length (nt) | % of nt in WC pairs | # WC bp in reference structure <sup>a</sup> | # correct WC bp of Mfold prediction | # incorrect WC bp of Mfold prediction | # correct WC bp of RNAfold prediction (MFE) | # incorrect WC bp of RNAfold prediction (MFE) | # correct WC bp of RNAfold prediction (centroid) | # incorrect WC bp of RNAfold prediction (centroid) | # correct WC bp of Sfold prediction | # incorrect WC bp of Sfold prediction | # correct WC bp of RNAstructure prediction | # incorrect WC bp of RNAstructure prediction | Average score |
|----------------------------------------------------------------------|----------------------|--------------|-------------|---------------------|---------------------------------------------|-------------------------------------|---------------------------------------|---------------------------------------------|-----------------------------------------------|--------------------------------------------------|----------------------------------------------------|-------------------------------------|---------------------------------------|--------------------------------------------|----------------------------------------------|---------------|
| Pistol ribozyme                                                      | <a href="#">1JFJ</a> | 18-Dec-2019  | 51          | 23.5                | 6                                           | 0                                   | 10                                    | 0                                           | 14                                            | 0                                                | 6                                                  | 0                                   | 11                                    | 0                                          | 10                                           | 0.00          |
| iMango-III fluorescent aptamer                                       | <a href="#">1PZJ</a> | 31-Jul-2019  | 37          | 37.8                | 7                                           | 0.00                                | 4                                     | 0                                           | 10                                            | 0.00                                             | 6                                                  | 0                                   | 0                                     | 0                                          | 10                                           | 0.00          |
| Corn aptamer                                                         | <a href="#">1E8Q</a> | 31-Jul-2019  | 36          | 38.9                | 7                                           | 0.37                                | 4                                     | 0.00                                        | 7                                             | 0.86                                             | 4                                                  | 0.86                                | 5                                     | 4                                          | 7                                            | 0.42          |
| pil-miRNA-449c-YdaO riboswitch fusion                                | <a href="#">1NSK</a> | 27-Nov-2019  | 125         | 46.4                | 29                                          | 0.16                                | 9                                     | 0.00                                        | 22                                            | 0.24                                             | 12                                                 | 0.16                                | 23                                    | 11                                         | 6                                            | 0.11          |
| U-A-U-rich RNA triple helix with 11 consecutive base triples         | <a href="#">1SVS</a> | 1-Jan-2020   | 79          | 48.1                | 19                                          | 0.62                                | 10                                    | 0.37                                        | 19                                            | 0.07                                             | 19                                                 | 0.49                                | 10                                    | 19                                         | 5                                            | 0.30          |
| Bacillus subtilis glyQS T-box riboswitch                             | <a href="#">1PDM</a> | 20-Nov-2019  | 155         | 51.6                | 40                                          | 0.35                                | 21                                    | 0.74                                        | 36                                            | 1.00                                             | 36                                                 | 0.37                                | 8                                     | 37                                         | 9                                            | 0.64          |
| L11-binding domain from E. coli 23S rRNA                             | <a href="#">1PER</a> | 8-Jan-2020   | 58          | 51.7                | 15                                          | 0.34                                | 5                                     | 0.72                                        | 13                                            | 0.74                                             | 13                                                 | 0.72                                | 5                                     | 13                                         | 5                                            | 0.65          |
| Group II intron retroelement                                         | <a href="#">1MEC</a> | 14-Aug-2019  | 867         | 53.5                | 232                                         | 0.58                                | 63                                    | 0.58                                        | 209                                           | 0.58                                             | 209                                                | 0.58                                | 54                                    | 204                                        | 54                                           | 0.58          |
| Tetrahydrofolate riboswitch aptamer bound to 5-deazatetrahydropterin | <a href="#">1QSZ</a> | 18-Dec-2019  | 89          | 56.2                | 25                                          | 0.62                                | 7                                     | 0.89                                        | 23                                            | 0.71                                             | 21                                                 | 0.89                                | 7                                     | 22                                         | 7                                            | 0.67          |
| T-box riboswitch discriminator                                       | <a href="#">1PMQ</a> | 20-Nov-2019  | 66          | 57.6                | 19                                          | 0.66                                | 2                                     | 0.66                                        | 19                                            | 0.60                                             | 19                                                 | 0.63                                | 2                                     | 19                                         | 2                                            | 0.64          |
| phi29 pRNA domain II                                                 | <a href="#">1JXM</a> | 21-Aug-2019  | 97          | 57.7                | 28                                          | 0.89                                | 2                                     | 0.89                                        | 27                                            | 0.89                                             | 26                                                 | 0.89                                | 2                                     | 26                                         | 1                                            | 0.89          |
| Manganese riboswitch                                                 | <a href="#">1NVZ</a> | 2-Oct-2019   | 99          | 64.6                | 32                                          | 0.90                                | 1                                     | 0.90                                        | 32                                            | 0.86                                             | 32                                                 | 0.90                                | 1                                     | 32                                         | 1                                            | 0.89          |
| HAV RES domain V                                                     | <a href="#">1MMN</a> | 14-Aug-2019  | 92          | 65.2                | 30                                          | 0.97                                | 6                                     | 0.94                                        | 26                                            | 0.94                                             | 26                                                 | 0.97                                | 6                                     | 26                                         | 6                                            | 0.96          |
| Mini tetraloop-tetraloop receptor                                    | <a href="#">1DVK</a> | 26-Jun-2019  | 95          | 65.3                | 31                                          | 0.69                                | 4                                     | 0.69                                        | 31                                            | 0.72                                             | 31                                                 | 0.69                                | 1                                     | 31                                         | 4                                            | 0.70          |
| Adenovirus-associated RNA                                            | <a href="#">1QL3</a> | 3-Jul-2019   | 112         | 76.8                | 43                                          | 0.87                                | 0                                     | 0.87                                        | 43                                            | 0.87                                             | 43                                                 | 0.87                                | 0                                     | 43                                         | 0                                            | 0.89          |
| SRSZ fragment of Rgs4 3' UTR                                         | <a href="#">1HDB</a> | 17-Apr-2019  | 31          | 83.9                | 13                                          | 0.98                                | 0                                     | 1.00                                        | 13                                            | 1.00                                             | 13                                                 | 0.98                                | 0                                     | 13                                         | 0                                            | 0.99          |
| helix 45 at 3' end of 12S rRNA                                       | <a href="#">1AAS</a> | 5-Jun-2019   | 28          | 85.7                | 12                                          | 1.00                                | 0                                     | 1.00                                        | 12                                            | 1.00                                             | 12                                                 | 1.00                                | 0                                     | 12                                         | 0                                            | 1.00          |

## Bibliography

1. Zuker M (2003) Mfold web server for nucleic acid folding and hybridization prediction. *Nucleic Acids Res* 31(13):3406–3415.
2. Gruber AR, Lorenz R, Bernhart SH, Neuböck R, Hofacker IL (2008) The Vienna RNA websuite. *Nucleic Acids Res* 36(Web Server issue):W70-4.
3. Chan CY, Lawrence CE, Ding Y (2005) Structure clustering features on the Sfold Web server. *Bioinformatics* 21(20):3926–3928.
4. Mathews DH, Turner DH, Watson RM (2016) RNA secondary structure prediction. *Curr Protoc Nucleic Acid Chem* 67:11.2.1-11.2.19.
